# Supplementary material for: Long-term antiretroviral therapy initiated in acute HIV infection prevents residual dysfunction of HIV-specific CD8+ T cells
Source: PubMed Central journal article supplement — eBioMedicine. 2022 Sep 8;84:104253. doi: 10.1016/j.ebiom.2022.104253 (PMC9471490; doi:10.1016/j.ebiom.2022.104253), 2022-09-08
Supplement: mmc1.pdf [file mmc1.pdf]

1 **Supplementary Methods**

2 *Antibodies and reagents for flow cytometry*

3 BV480-labeled anti-CD3, BUV496-labeled anti-CD8, BUV563-labeled anti-CD4, BUV615P-  
4 labeled anti-Perforin, BUV737-labeled anti-PD-1, BUV805-labeled anti-CD45RA, FITC-labeled  
5 anti-CD8, Brilliant Stain Buffer, and Brilliant Stain Buffer Plus were obtained from BD  
6 Biosciences. APC eF750-labeled anti-Granzyme B, BV421-labeled anti-CD95, BV421-labeled  
7 Mouse IgG1 $\kappa$  Isotype Control, BV605-labeled anti-CD4, BV711-labeled anti-T-bet, BV750-  
8 labeled anti-CD27, PE-labeled anti-TCF-1, PE Cy5-labeled anti-CD127, PE Cy7-labeled anti-  
9 CCR7, PE Cy7-labeled anti-CD3, and PerCP Cy5.5-labeled anti-CD8 came from BioLegend.  
10 Alexa Fluor 488-labeled anti-TOX obtained from Cell Signaling Technology. PE-eFluor 610-  
11 labeled anti-EOMES, LIVE/DEAD Fixable Dead Cell Stain Kits (Aqua, Near-IR, and Yellow),  
12 CellTrace Cell Proliferation Kits (Violet and CFSE), Foxp3/ Transcription Factor Staining  
13 Buffer Set, and CountBright Absolute Counting Beads were from Thermo Fisher Scientific.  
14 HLA-A\*1101 HIV-1 NEF (GAFDLSFFLK and QVPLRPMTYK), HLA-A\*1101 HIV-1 POL  
15 (AIFQSSMTKIL), HLA-A\*1101 EBV EBNA 3B (AVFDRKSDAK), HLA-Cw\*0102 HIV-1  
16 GAG (YSPVSILDI), and HLA-Cw\*0102 HIV-1 ENV (CTPAGYAIL) soluble biotinylated  
17 monomers were produced at NIH Tetramer Core Facility as previously described<sup>53</sup> and  
18 tetramerized with BV650-labeled Streptavidin (BioLegend) or PE-conjugated ExtrAvidin  
19 (Sigma-Aldrich).

20

21 *Flow cytometry analysis*

22 For phenotypic analysis of antigen-specific CD8<sup>+</sup> T cells, thawed (*ex vivo*) or peptide stimulated  
23 PBMCs were first stained with BV650-labeled pMHC tetramer and LIVE/DEAD Yellow at

24 37°C for 15 minutes. Cells were stained for other cell surface markers in Brilliant Stain Buffer at  
25 4°C for 20 minutes followed by 2 times wash with PBS containing 2% FBS (washing buffer).  
26 Cells were fixed/permeabilized and stained for c-Myc, Eomes, Granzyme B, Perforin, T-bet, and  
27 TCF-1 in Foxp3 permeabilization buffer supplemented with Brilliant Stain Buffer Plus at room  
28 temperature for 30 minutes followed by 2 times wash with Foxp3 permeabilization buffer and  
29 washing buffer, respectively. Stained cells were fixed in PBS containing 2% formaldehyde,  
30 CountBright beads were added to all the samples before flow cytometry analysis, and the  
31 tetramer<sup>+</sup> cell number was normalized based on the number of the CountBright beads recorded  
32 using a FACSymphony A5 (BD Biosciences).

33 For the cytotoxic killing assay, co-cultured cells were first stained with BV650-labeled tetramer  
34 and LIVE/DEAD Near-IR at 37°C for 15 minutes followed by staining of the other cell surface  
35 markers as described above. The stained cells were fixed in PBS containing 2% formaldehyde  
36 and analyzed on a LSRII (BD Biosciences).

37 For single cell RNA sequencing, thawed PBMCs were first stained with PE-labeled HLA-  
38 A\*1101 HIV-1 NEF (GAFDLSFFLK) tetramer and LIVE/DEAD aqua followed by staining of  
39 CD8 as described above. Individual live CD8<sup>+</sup>tetramer<sup>+</sup> cells were directly sorted into wells of a  
40 PCR 96 well plate pre-loaded with 5µl of Buffer TCL (Qiagen) containing 1% 2-  
41 mercaptoethanol using a FACS Aria II (BD Biosciences).

42 All flow cytometry data were analyzed with FlowJo v10 (FlowJo, LLC).

43

#### 44 *Single cell RNA sequencing*

45 A total of 405 single HIV-specific CD8<sup>+</sup> T cells from 6 participants (3 each from AHI Stage 1  
46 and 3) were sorted directly into 5 µl of Buffer TCL (Qiagen, Germantown, MD) + 1% 2-

47 Mercaptoethanol (Sigma-Aldrich, St. Louis, MO) in individual wells of skirted MicroAmp 96-  
48 well plates (Applied Biosystems) and immediately snap-frozen (see Flow cytometry analysis in  
49 Supplemental Materials and Methods). After thawing, 10  $\mu$ l of exogenous ERCC RNA Spike-In  
50 Mix 1 (Life Technologies Corp, Carlsbad, CA) was added to each lysed cell to a final dilution of  
51  $\sim$ 1:110,000,000. Total RNA from these cells was then purified, and full-length cDNA prepared  
52 using SmartSeq technology <sup>1,2</sup>. Libraries were made using the Nextera XT DNA Sample  
53 Preparation Kit (Illumina, San Diego, CA). Briefly, 300 pg of cDNA from each cell were  
54 fragmented, uniquely dual-indexed, amplified, and purified. The resulting libraries were  
55 quantitated with the Quant-iT HS DNA kit (ThermoFisher Scientific) on the FilterMax 3  
56 (Molecular Devices, San Jose, CA) with random samples also run on the BioAnalyzer using  
57 High Sensitivity DNA chips (both Agilent, Santa Clara, CA) for QC and fragment size  
58 determinations. Each cell library was diluted to 2 nM with Resuspension Buffer (Illumina).  
59 Libraries were pooled and denatured prior to loading on 3 NextSeq 500/550 Hi Output 300-  
60 cycle v2.5 reagent cartridges and sequenced on the NextSeq (all Illumina) sequencing instrument  
61 per manufacturer's recommendations. We targeted  $\sim$ 1.5 million reads per sample.

62

### 63 *Single cell sequence analysis*

64 Paired-end sequencing data was converted to fastq, and adapters were masked using bcl2fastq  
65 v2.17.1.14 software (Illumina). The raw fastq files were examined for quality and reads were  
66 trimmed using fastp v0.19.7 <sup>3</sup> when the average quality score of a 15-base pair sliding window  
67 fell below Q20. Trimmed reads with a minimum length of 50 base pairs were retained. A median  
68 of 10% raw reads was discarded when using these parameters. Trimmed paired-end reads were  
69 aligned with HISAT2 v2.1.0 <sup>4</sup> to the human genome GRCh38 with Ensemble gene annotation

70 v97 and ERCC sequences. Gene expression quantification was performed using Subread  
71 featureCounts v1.6.2<sup>5</sup>.  
72  
73 *TCR repertoire analysis*  
74 MiXCR v2.1.5 was used to identify the CDR3 region of the TRA and TRB from the scRNA-seq  
75 reads. TCR repertoire similarity for  $\alpha$  and  $\beta$  chains was calculated between 2 visits more than 1  
76 year apart during ART using the Morisita-Horn index in the vegan R package. Analysis was  
77 done for the two participants that had at least 20 cells with one functional TRA or TRB CDR3  
78 (MixCR cloneCount >1) at both visits.  
79  
80

#### 81 **Supplementary References:**

82

- 83 1. Trombetta JJ, Gennert D, Lu D, Satija R, Shalek AK, Regev A. Preparation of Single-  
84 Cell RNA-Seq Libraries for Next Generation Sequencing. *Curr Protoc Mol Biol* 2014; **107**: 4 22  
85 1-17.
- 86 2. Picelli S, Bjorklund AK, Faridani OR, Sagasser S, Winberg G, Sandberg R. Smart-seq2  
87 for sensitive full-length transcriptome profiling in single cells. *Nat Methods* 2013; **10**(11): 1096-  
88 8.
- 89 3. Chen S, Zhou Y, Chen Y, Gu J. fastp: an ultra-fast all-in-one FASTQ preprocessor.  
90 *Bioinformatics* 2018; **34**(17): i884-i90.
- 91 4. Kim D, Paggi JM, Park C, Bennett C, Salzberg SL. Graph-based genome alignment and  
92 genotyping with HISAT2 and HISAT-genotype. *Nat Biotechnol* 2019; **37**(8): 907-15.
- 93 5. Liao Y, Smyth GK, Shi W. featureCounts: an efficient general purpose program for  
94 assigning sequence reads to genomic features. *Bioinformatics* 2014; **30**(7): 923-30.  
95  
96

97 **Supplemental Table**

98 **Table S1. Epitope peptides and pMHC tetramers used.**

| Epitope AA Seq | Symbol | Antigen | Location       | HLA restriction |
|----------------|--------|---------|----------------|-----------------|
| GAFDLSFFLK     | GK10   | HIV     | Nef 83-92      | HLA-A*11:01     |
| QVPLRPMTYK     | QK10   | HIV     | Nef 73-82      | HLA-A*11:01     |
| AIFQSSMTK      | AK9    | HIV     | Pol 313-321    | HLA-A*11:01     |
| YSPVSILDI      | YI9    | HIV     | Gag 277-285    | HLA-C*01:02     |
| CTPAGYAIL      | CL9    | HIV     | Env 218-226    | HLA-C*01:02     |
| AVFDRKSDAK     | EBV    | EBV     | EBNA3B 399-408 | HLA-A*11:01     |

99

**Table S2. Epitope in autologous sequences in participants treated from AHI**

| PID   | Epitope designation | Epitope (Tested) | Epitope (Participant sequence) | n_mismatch (tested - participant) |
|-------|---------------------|------------------|--------------------------------|-----------------------------------|
| P0006 | A11 GK10            | GAFDLSFFLK       | GAFDLSFFLK:10                  | 0                                 |
| P0022 | A11 GK10            | GAFDLSFFLK       | GAFDLSFFLK:13                  | 0                                 |
| P0024 | Cw01 CL9            | CTPAGYAIL        | CTPAGYAIL:10                   | 0                                 |
| P0027 | A11 GK10            | GAFDLSFFLK       | GAFDLSFFLK:10                  | 0                                 |
| P0028 | A11 GK10            | GAFDLSFFLK       | AAFDLSFFLK:9,<br>EAFDLSFFLK:1  | 1, 1                              |
| P0029 | A11 GK10            | GAFDLSFFLK       | GAFDLSFFLK:10                  | 0                                 |
| P0030 | A11 GK10            | GAFDLSFFLK       | AAFDLSFFLK:10                  | 1                                 |
| P0033 | A11 GK10            | GAFDLSFFLK       | GAFDLSFFLK:1                   | 0                                 |
| P0050 | A11 GK10            | GAFDLSFFLK       | GAFDLSFFLK:10                  | 0                                 |
| P0055 | A11 GK10            | GAFDLSFFLK       | GAFDLSFFLK:10                  | 0                                 |
| P0059 | A11 GK10            | GAFDLSFFLK       | GAFDLSFFLK:1                   | 0                                 |
| P0062 | Cw01 YI9            | YSPVSILDI        | YSPVSILDI:9                    | 0                                 |
| P0070 | A11 GK10            | GAFDLSFFLK       | GAFDLSFFLK:10                  | 0                                 |
| P0076 | A11 GK10            | GAFDLSFFLK       | GAFDLSFFLK:10                  | 0                                 |
| P0078 | Cw01 YI9            | YSPVSILDI        | YSPTSILDI:10                   | 1                                 |
| P0088 | A11 QK10            | QVPLRPMTYK       | QVPLRPMTYK:10                  | 0                                 |
| P0091 | Cw01 YI9            | YSPVSILDI        | YSPVSILDI:10                   | 0                                 |
| P0100 | A11 GK10            | GAFDLSFFLK       | GAFDLSFFLK:10                  | 0                                 |
| P0101 | A11 GK10            | GAFDLSFFLK       | AAFDLSFFLK:10                  | 1                                 |
| P0105 | A11 GK10            | GAFDLSFFLK       | GAFDLSFFLK:9                   | 0                                 |
| P0110 | Cw01 CL9            | CTPAGYAIL        | CTPAGYALL:10                   | 1                                 |
| P0105 | A11 AK9             | AIFQSSMTK        | AIFQSSMTK:10                   | 0                                 |

100

101 “*Epitope (Participant sequence)*”: predicted epitope in the HIV-1 sequences from a participant,  
 102 with the number of sequences obtained. “*n\_mismatch (tested - participant)*”: number of  
 103 mismatches between the epitopes tested and in the participant’s sequences.

104

**Table S3. Epitope in autologous sequences in participants treated from CHI**

| PID    | Epitope designation | Epitope (Tested) | Epitope (Participant sequence) | n_mismatch (tested - participant) |
|--------|---------------------|------------------|--------------------------------|-----------------------------------|
| P0018  | A11 GK10            | GAFDLSFFLK       | GAFDLSFFLK:11                  | 0                                 |
| P0048B | A11 GK10            | GAFDLSFFLK       | GAFDLSFFLK:1                   | 0                                 |
| P0050B | Cw01 YI9            | YSPVSILDI        | YSPVSILDI:1                    | 0                                 |
| P0051B | A11 QK10            | QVPLRPMTYK       | QVPLRPMTFK:1                   | 1                                 |
| P0054B | Cw01 YI9            | YSPVSILDI        | YSPVSILDI:1                    | 0                                 |
| P0004  | A11 GK10            | GAFDLSFFLK       | GAFDLSFFLK:10                  | 0                                 |
| P0029  | A11 GK10            | GAFDLSFFLK       | GAFDLSFFLK:10                  | 0                                 |
| P0034  | Cw01 CL9            | CTPAGYAIL        | CTPAGYAIL:28,<br>CTPAGYTIL:1   | 0, 1                              |

105 “Epitope (Participant sequence)”: predicted epitope in the HIV-1 sequences from a participant,  
106 with the number of sequences obtained. “n\_mismatch (tested - participant)”: number of  
107 mismatches between the epitopes tested and in the participant’s sequences.

108

**Table S4. CD8<sup>+</sup> T cell epitope prediction in sequences from participants.**

**HLA-A\*11:01 restricted GK10 Nef peptides**

| Peptide    | Score EL | Rank EL (%) | Score BA | Rank BA (%) | Affinity (nM) | Bind Level |
|------------|----------|-------------|----------|-------------|---------------|------------|
| GAFDLSFFLK | 0.79     | 0.11        | 0.82     | 0.02        | 6.72          | Strong     |
| AAFDLSFFLK | 0.89     | 0.04        | 0.86     | 0.01        | 4.75          | Strong     |
| EAFDLSFFLK | 0.21     | 1.05        | 0.58     | 0.54        | 93.78         | Weak       |

109

**HLA-A\*11:01 restricted QK10 Nef peptides**

| Peptide    | Score EL | Rank EL (%) | Score BA | Rank BA (%) | Affinity (nM) | Bind Level |
|------------|----------|-------------|----------|-------------|---------------|------------|
| QVPLRPMTYK | 0.64     | 0.21        | 0.72     | 0.11        | 19.8          | Strong     |
| QVPLRPMTFK | 0.57     | 0.29        | 0.71     | 0.13        | 22.4          | Strong     |

110

**HLA-A\*11:01 restricted AK9 Pol peptides**

| Peptide   | Score EL | Rank EL (%) | Score BA | Rank BA (%) | Affinity (nM) | Bind Level |
|-----------|----------|-------------|----------|-------------|---------------|------------|
| AIFQSSMTK | 0.98     | 0.01        | 0.83     | 0.02        | 6.64          | Strong     |
| AIFQCSMTK | 0.91     | 0.03        | 0.82     | 0.02        | 7.04          | Strong     |

111

112

**HLA- C\*01:02 restricted YI9 Gag peptides**

| Peptide   | Score EL | Rank EL (%) | Score BA | Rank BA (%) | Affinity (nM) | Bind Level            |
|-----------|----------|-------------|----------|-------------|---------------|-----------------------|
| YSPVSILDI | 0.45     | 0.16        | 0.55     | 0.06        | 132.70        | Strong <sup>116</sup> |
| YSPTSILDI | 0.57     | 0.10        | 0.58     | 0.05        | 96.34         | Strong <sup>117</sup> |

113

114

115

116

117

**HLA- C\*01:02 restricted CL9 Env peptides**

| Peptide   | Score EL | Rank EL (%) | Score BA | Rank BA (%) | Affinity (nM) | Bind Level |
|-----------|----------|-------------|----------|-------------|---------------|------------|
| CTPAGYAIL | 0.41     | 0.19        | 0.61     | 0.03        | 64.91         | Strong     |
| CTPAGYALL | 0.38     | 0.21        | 0.59     | 0.04        | 82.40         | Strong     |
| CTPAGYTIL | 0.52     | 0.13        | 0.61     | 0.03        | 71.08         | Strong     |

118

119 **Table S5. TCR repertoire similarity of memory HIV-specific CD8<sup>+</sup> T cells during long term**  
 120 **suppressive ART in people treated from AHI.**

| PID   | AHI stage started | ART duration at   | ART duration at    | Morisita-Horn similarity index |             |
|-------|-------------------|-------------------|--------------------|--------------------------------|-------------|
|       | ART               | first visit (yrs) | second visit (yrs) | TCR $\alpha$                   | TCR $\beta$ |
| P0006 | Stage 3           | 2.3               | 4.4                | 0.77                           | 0.65        |
| P0070 | Stage 3           | 1.6               | 3.0                | 0.84                           | 0.64        |

121 The CDR3 region of the TRA and TRB was sequenced by single cell RNA sequencing, and  
 122 MiXCR was used to identify individual TCRs. TCR repertoire similarity was calculated as the  
 123 Morisita-Horn index between 2 visits more than 1 year apart during suppressive ART. Analysis  
 124 was done for the two participants that had at least 20 cells with one functional TRA or TRB  
 125 CDR3 (MixCR cloneCount >1) at both visits.



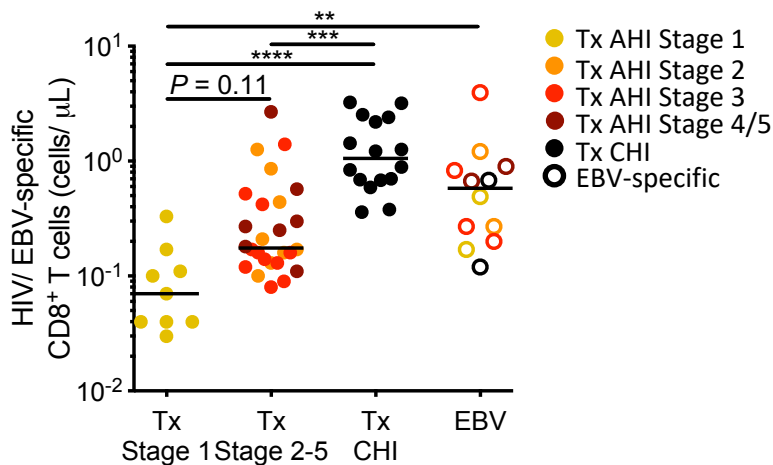

**Figure S1. HIV-specific CD8<sup>+</sup> T cells in people treated from different stages of acute and chronic HIV infection.** Number of HIV- and EBV-specific tetramer<sup>+</sup> CD8<sup>+</sup> T cells per  $\mu\text{L}$  of peripheral blood in individuals who initiated treatment in AHI or in CHI and were on ART for more than 1 year. The fourth-generation immunoassay (4G IA) staging system was used to group RV254 participants who initiated ART at the earliest stages of acute infection, AHI 4G stage 1 (NAT+, 4G IA-), and AHI Stage 2 (NAT+4G IA+). Participants who started ART at peak viremia or later in AHI (NAT+4G IA+3G IA+) were further classified into Stage 3 (WB-) and Stage 4/5 (WB+/- and WB+, respectively). Differences among groups were analyzed by Kruskal-Wallis test (\*\* $P < 0.01$ ; \*\*\* $P < 0.001$ ; \*\*\*\* $P < 0.0001$ ).

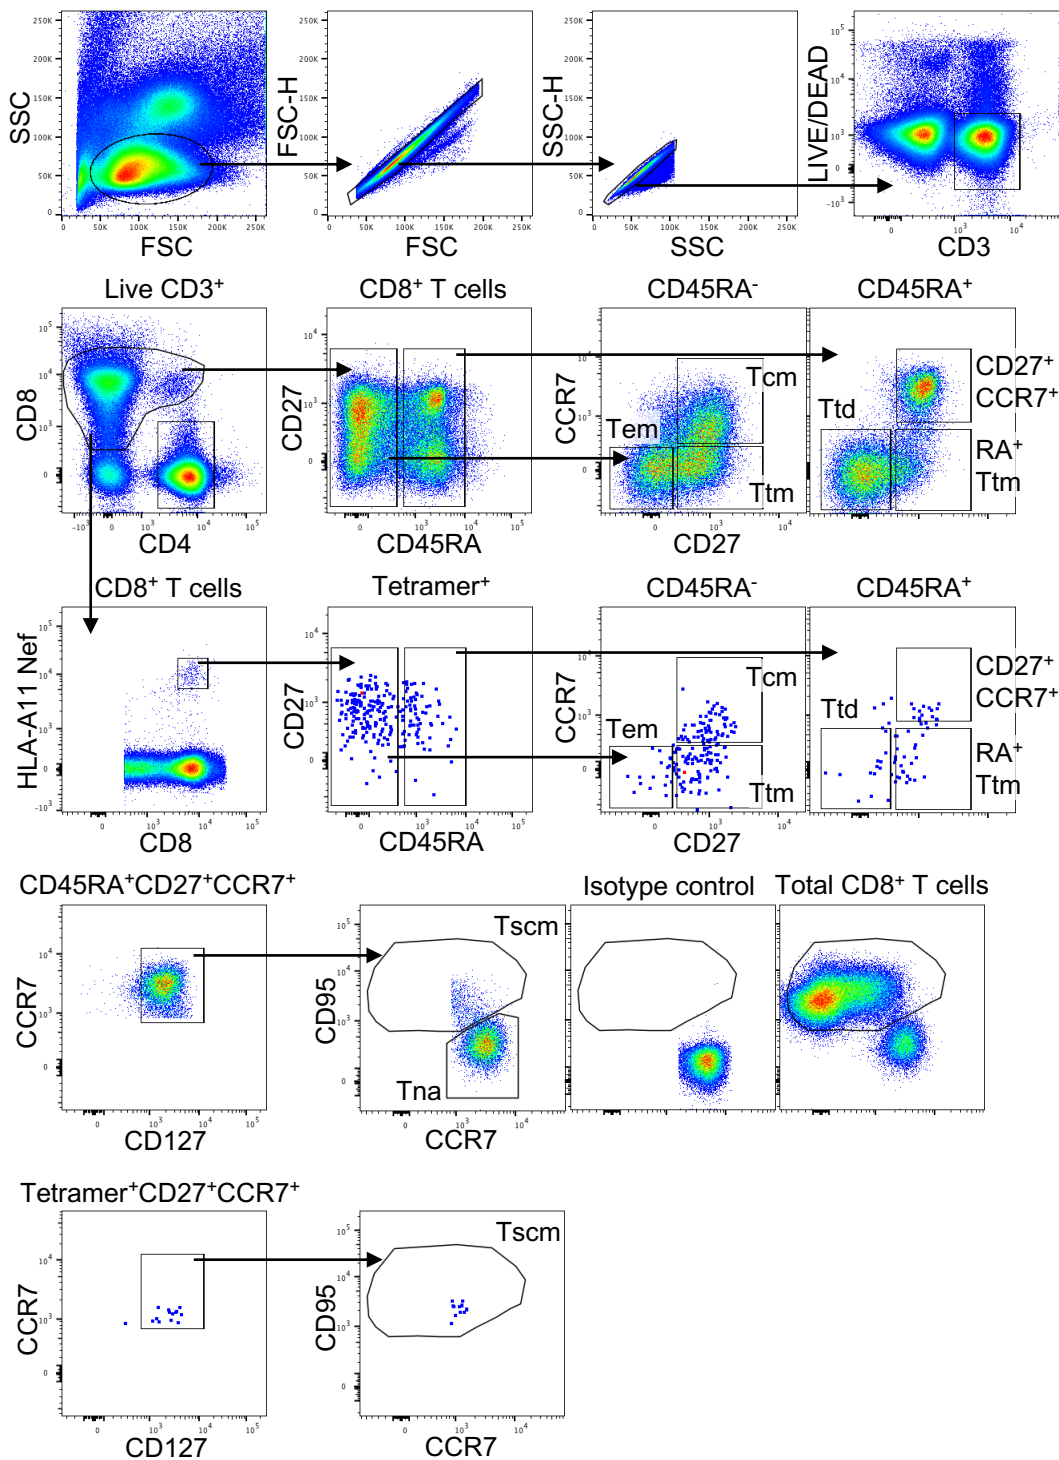

**Figure S2. Gating strategy for flow cytometry analysis of tetramer<sup>+</sup> HIV- or EBV-specific CD8<sup>+</sup> T cells.** Each CD8 T cell subset was classified as follow; Tna: CD45RA<sup>+</sup>CCR7<sup>+</sup>CD27<sup>+</sup>, Tscm: CD45RA<sup>+</sup>CCR7<sup>+</sup>CD27<sup>+</sup> CD127<sup>+</sup>CD95<sup>+</sup>, Tcm: CD45RA<sup>-</sup>CCR7<sup>+</sup>CD27<sup>+</sup>, Ttm: CD45RA<sup>-</sup>CCR7<sup>-</sup>CD27<sup>+</sup>, RA<sup>+</sup>Ttm: CD45RA<sup>+</sup>CCR7<sup>-</sup>CD27<sup>+</sup>, Tem: CD45RA<sup>-</sup>CCR7<sup>-</sup>CD27<sup>-</sup>, Ttd: CD45RA<sup>+</sup>CCR7<sup>-</sup>CD27<sup>-</sup>. To confirm CD95<sup>+</sup> Tscm, isotype matched control antibody was used.

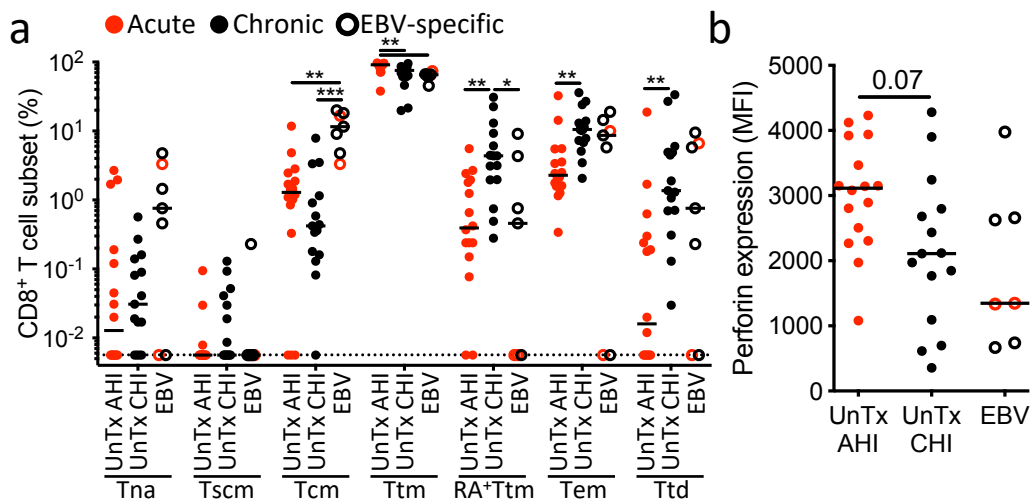

**Figure S3. Phenotypic change of HIV-specific CD8<sup>+</sup> T cells before and during ART initiated in chronic and acute HIV infection.** (a) Frequencies of naïve-like (Tna), stem cell memory (Tscm), central memory (Tcm), transitional memory (Ttm), CD45RA<sup>+</sup> transitional memory (RA<sup>+</sup> Ttm), effector memory (Tem), and terminally differentiated cells (Ttd) in HIV/EBV-specific CD8<sup>+</sup> T cells prior to ART initiation in AHI (n=19) or CHI (n=15). (b) Expression of Perforin in HIV/EBV-specific CD8<sup>+</sup> T cells. Differences between groups were analyzed by Kruskal-Wallis test. \*P< 0.05; \*\*P< 0.01; \*\*\*P< 0.001.

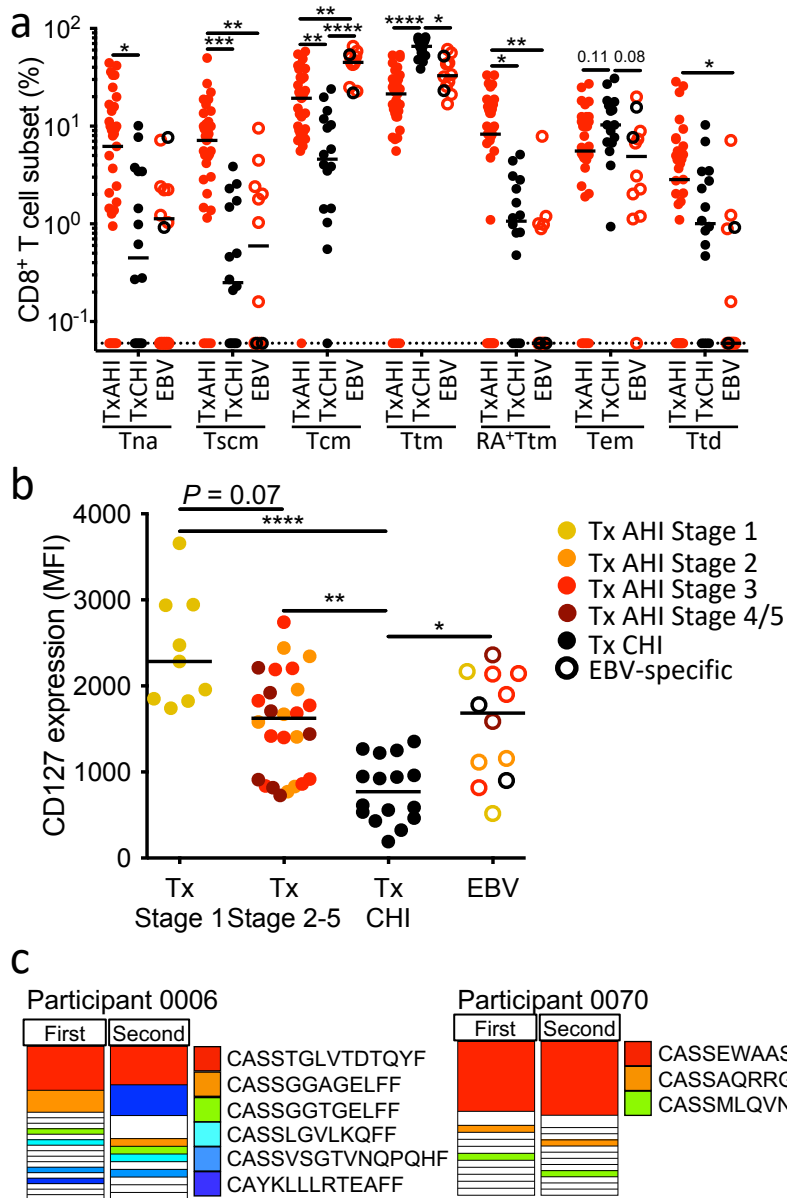

**Figure S4. HIV-specific memory CD8<sup>+</sup> T cells in people treated from different stages of acute and chronic HIV infection.** (a) Frequencies of Tna, Tscm, Tcm, Ttm, RA<sup>+</sup> Ttm, Tem, and Ttd in HIV/EBV-specific CD8<sup>+</sup> T cells from individuals who initiated treatment from AHI or CHI and were on ART for more than 1 year. (b) Expression of CD127 on HIV/EBV-specific CD8<sup>+</sup> T cells. (c) Repertoire clonality of memory HIV-specific CD8<sup>+</sup> T cells during long-term ART was determined by comparing the CDR3 region of the TRB using MiXCR after single cell RNA sequencing. Each segmented bar represents the frequency of cells within singly sorted HIV Nef epitope-specific CD8<sup>+</sup> T cells carrying each unique TCR clone. TCR clones shared between 2 visits more than 1 year apart during long-term ART within each participant are color-coded and their amino acid sequences are shown. Differences among groups were analyzed by Kruskal-Wallis test (\* $P < 0.05$ ; \*\* $P < 0.01$ ; \*\*\* $P < 0.001$ ; \*\*\*\* $P < 0.0001$ ).

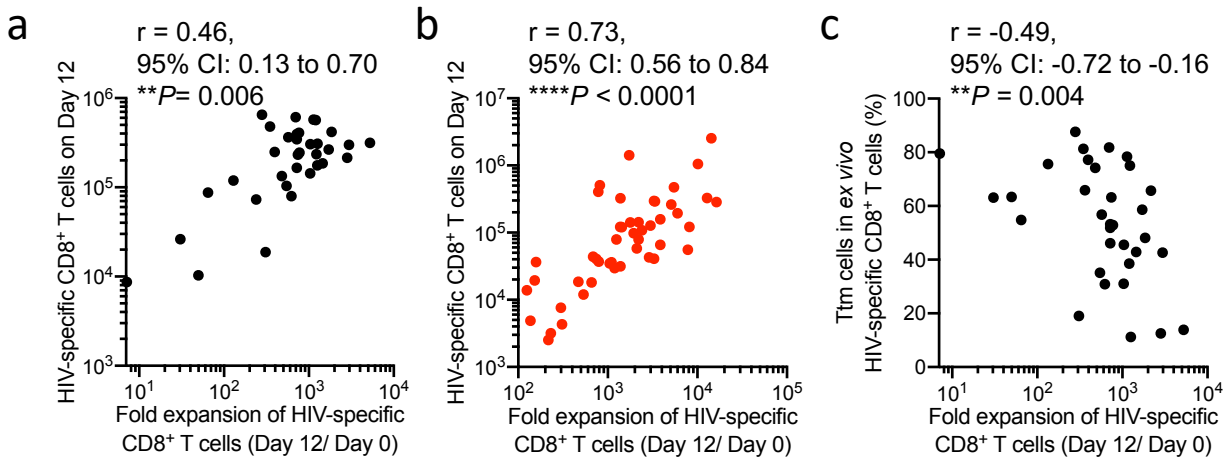

**Figure S5. Correlations with the magnitude of recalled memory CD8<sup>+</sup> T cell expansion.** (a, b) Correlation between the fold expansion of HIV-specific CD8<sup>+</sup> T cells from people treated from CHI (a) and AHI (b) and the cell number 12 days after peptide stimulation. (c) Correlation between the fold expansion of HIV-specific CD8<sup>+</sup> T cells and *ex vivo* frequency of Ttm in HIV-specific CD8<sup>+</sup> T cells from people treated from CHI. Correlations were analyzed by Spearman correlation with the Benjamini-Hochberg procedure for multiple comparisons (FDR < 0.1).

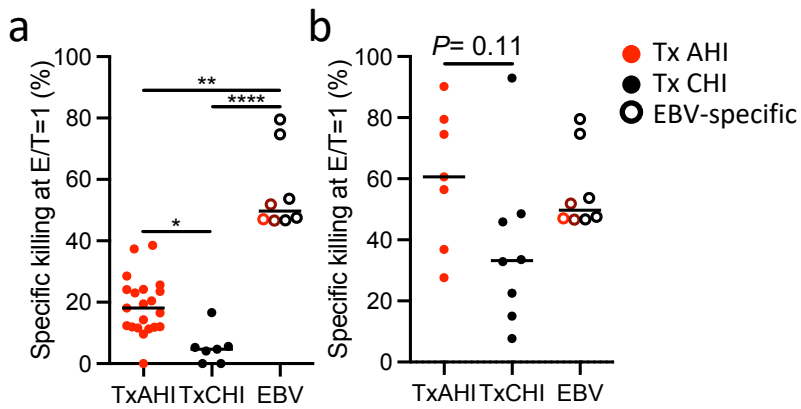

**Figure S6. Cytotoxic capacity of recalled HIV-specific and EBV-specific CD8<sup>+</sup> T cells.** (a) Cytotoxic capacity of day 13 recalled HIV Nef GK10- or EBV- specific CD8<sup>+</sup> T cells cultured with autologous CD4<sup>+</sup> T cells at an effector/ target ratio of 1. (b) Cytotoxic capacity of recalled non GK10-specific CD8<sup>+</sup> T cells, HLA-A11 Nef (QK10, n= 5) and Pol (AK9, n= 1), HLA-Cw01 Gag (YI9, n= 6) and Env (CL9, n= 3), or EBV- specific CD8<sup>+</sup> T cells cultured at an effector/target ratio of 1. Differences were analyzed by Kruskal-Wallis test (\*P< 0.05; \*\*P< 0.01; \*\*\*\*P< 0.0001).

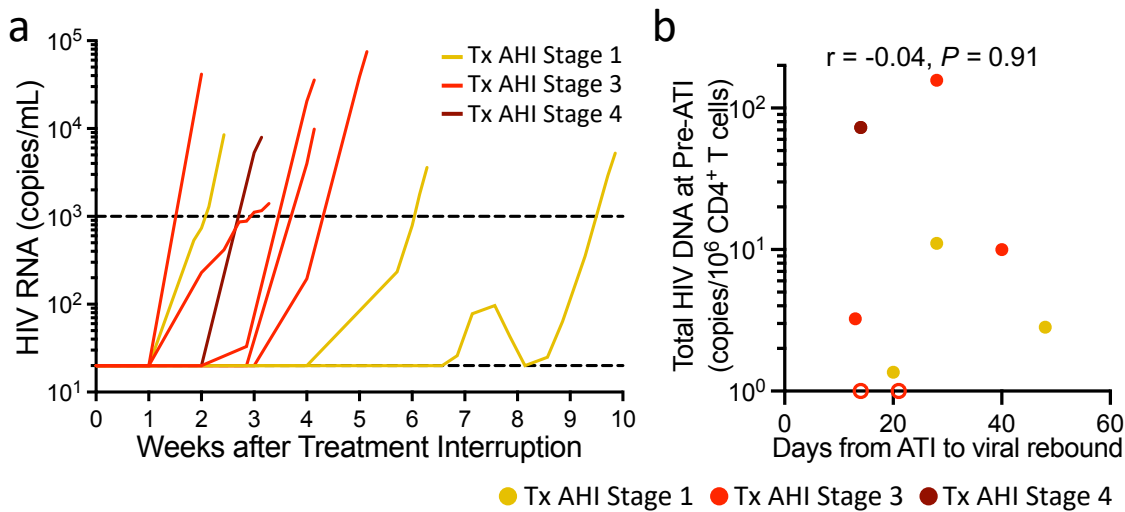

**Figure S7. Time to viral load rebound does not correlate with HIV reservoir size in the participants underwent ATI.** (a) Plasma HIV-1 RNA after ART interruption. The detection limit 20 HIV-1 RNA copies per mL and ART resumption criteria 1000 or more copies per mL are shown as dotted lines. (b) Correlation between days to viral load rebound (VL > 20 copies/mL) after ATI and total HIV DNA copies per  $10^6$  CD4<sup>+</sup> T cells at baseline ATI. For samples in which no positive cells were detected, the limit of detection based on cell input is plotted as an open symbol. Correlations were analyzed by Spearman correlation.

**The RV254/SEARCH 010 and RV304/SEARCH 013 study group**

**IHRI/ SEARCH/HIV-NAT/Chulalongkorn University**

Nipat Teeratakulpisarn  
Supanit Pattanachaiwit  
Somchai Sriplienchan  
Ponpen Tantivitayakul  
Ratchapong Kanaprach,  
Kiat Ruxrungtham  
Netsiri Dumrongpisutikul  
Ponlapat Rojnuckarin  
Suthat Chottanapund  
Kultida Poltavee  
Tassanee Luekasemsuk  
Hathairat Savadsuk  
Suwanna Puttamsawin  
Khunthalee Benjapornpong  
Nisakorn Ratnaratorn  
Kamonkan Tangnaree  
Chutharat Munkong  
Rommanus Thaimanee  
Patcharin Eamyong  
Sasiwimol Ubolyam  
Sukalya Lerdlum  
Sopark Manasnayakorn  
Rugsun Rerknimitr  
Sunee Sirivichayakul  
Phandee Wattanaboonyongcharoen

**AFRIMS**

Jessica Cowden  
Alexandra Schuetz  
Siriwat Akapirat  
Nampueng Churikanont  
Saowanit Getchalarat

**MHRP**

Denise Hsu  
Ellen Turk  
Oratai Butterworth  
Mark Milazzo  
Leigh Anne Eller  
Julie Ake



Leigh Anne Eller

**Yale University School of Medicine**

Serena Spudich

**DAIDS Clinical Representative**

CAPT Lawrence Fox

**SEARCH011 study group**

Silvia Ratto-Kim  
Victor DeGruttola  
Yotin Chinvarun  
Pasiri Sithinamsuwan  
James Fletcher  
Bruce Shiramizu  
Alexandra Schuetz
